# Supplementary material for: Encoding of cerebellar dentate neuron activity during visual attention in rhesus macaques
Source: eLife. 2025 Jan 16;13:RP99696. doi: 10.7554/eLife.99696 (PMC11737872; doi:10.7554/eLife.99696)
Supplement: Supplementary file 2. [file elife-99696-supp2.docx]

**Supplementary Material**

**Encoding of cerebellar dentate neuron activity during visual attention in rhesus macaques**

Nico A. Flierman1,2#, Sue Ann Koay3#, Willem S. van Hoogstraten2, Tom J.H. Ruigrok2, Pieter R. Roelfsema1,4,5, Aleksandra Badura2* and Chris I. De Zeeuw1,2*

1 Netherlands Institute for Neuroscience, Amsterdam, 1105 BA, The Netherlands

2 Department of Neuroscience, Erasmus MC, Rotterdam, 3015 CN, The Netherlands

3 Janelia Research Campus, Howard Hughes Medical Institute, Ashburn, VA 20174, USA

4 Department of Integrative Neurophysiology, VU University, Amsterdam, 1081 HV, The Netherlands

5 Department of Psychiatry, Academic Medical Centre, Amsterdam, 1105 AZ, The Netherlands

# These authors contributed equally to this work.

***Correspondence**:

Aleksandra Badura ([a.badura@erasmusmc.nl](mailto:a.badura@erasmusmc.nl))

Department of Neuroscience, Erasmus MC

Wytemaweg 80, 3015 CN Rotterdam

tel: 0031-(0)10 7043589

Chris I De Zeeuw ([c.de.zeeuw@nin.knaw.nl](mailto:c.de.zeeuw@nin.knaw.nl))

Netherlands Institute for Neuroscience

Meibergdreef 47,1105 BA, Amsterdam

tel: 0031-(0)20- 5665500

| Ramping latency (ms) | Mean  (correct) | St. Dev  (correct) | Mean  (incorrect) | St. Dev  (incorrect) | N  (neurons) |
| --- | --- | --- | --- | --- | --- |
| Mo | 312.8 | 234.1 | 319.8 | 227.0 | 64 |
| Mi | 412.4 | 238.9 | 451.8 | 233.2 | 68 |

***Supplementary File 2.*** *Descriptive statistics of latency to ramping onset.*
